# Supplementary material for: A visible-light-responsive metal–organic framework for highly efficient and selective photocatalytic oxidation of amines and reduction of nitroaromatics
Source: Royal Society of Chemistry journal article supplement (doi:10.1039/c9ta10723a), 2019-01-01
Supplement: c9ta10723a1.pdf [file c9ta10723a1.pdf]

## Supporting Information

### **A visible-light-responsive metal-organic framework for highly efficient and selective photocatalytic oxidation of amines and reduction of nitroaromatics**

Peiqi Chen, Zhifen Guo, Xin Liu, Hui Lv, Yan Che, Rong Bai, Yanhong Chi and Hongzhu Xing \*

*Provincial Key Laboratory of Advanced Energy Materials, College of Chemistry, Northeast Normal University, Changchun, 130024, China.*

E-mail: xinghz223@nenu.edu.cn

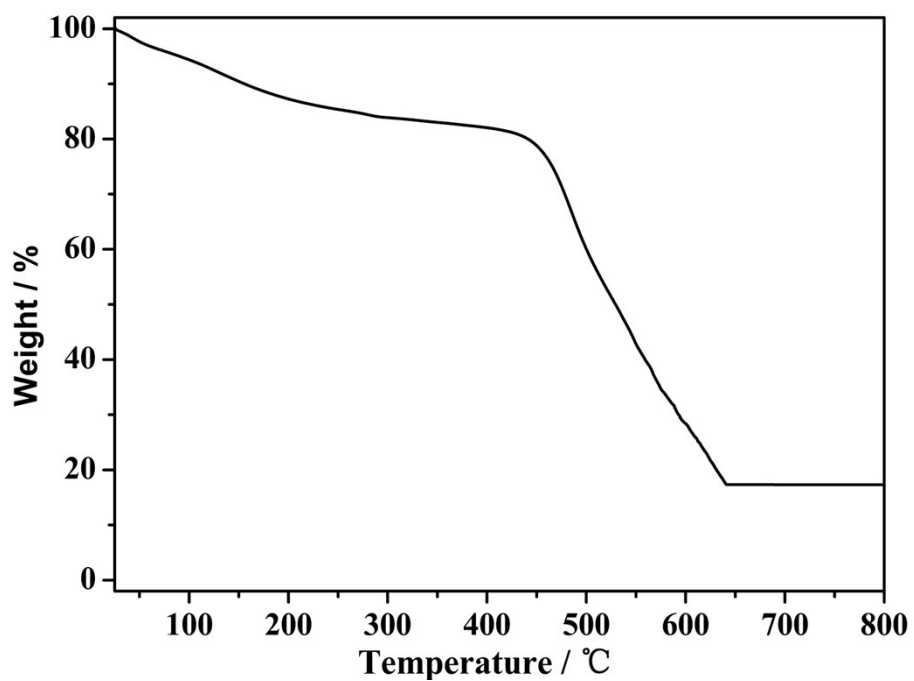

Figure S1. TG curve of 1.

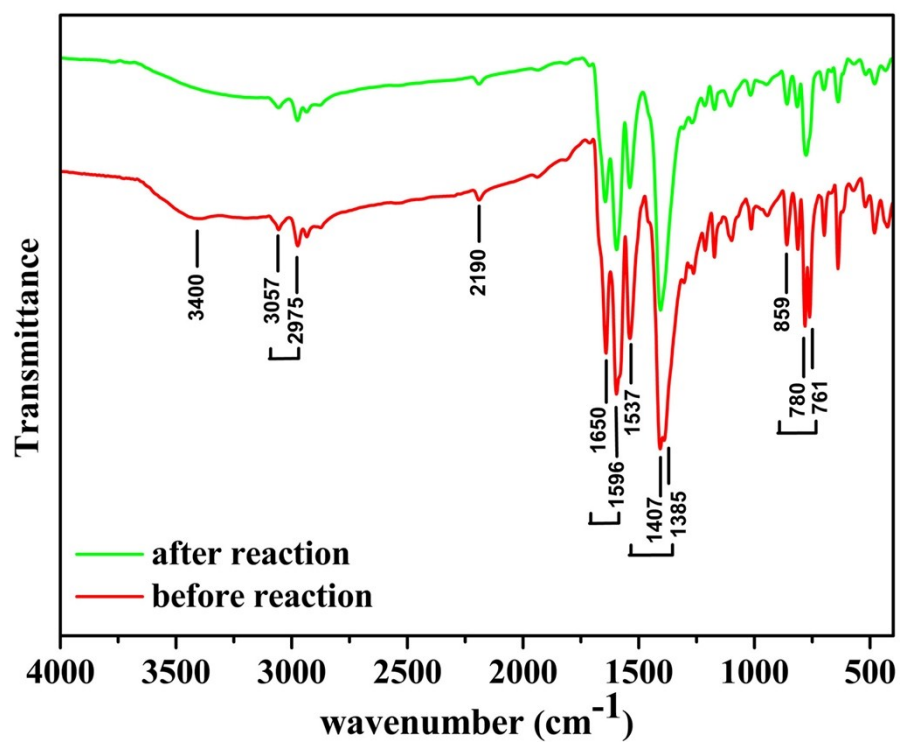

Figure S2. FTIR spectra of 1 before and after reaction.

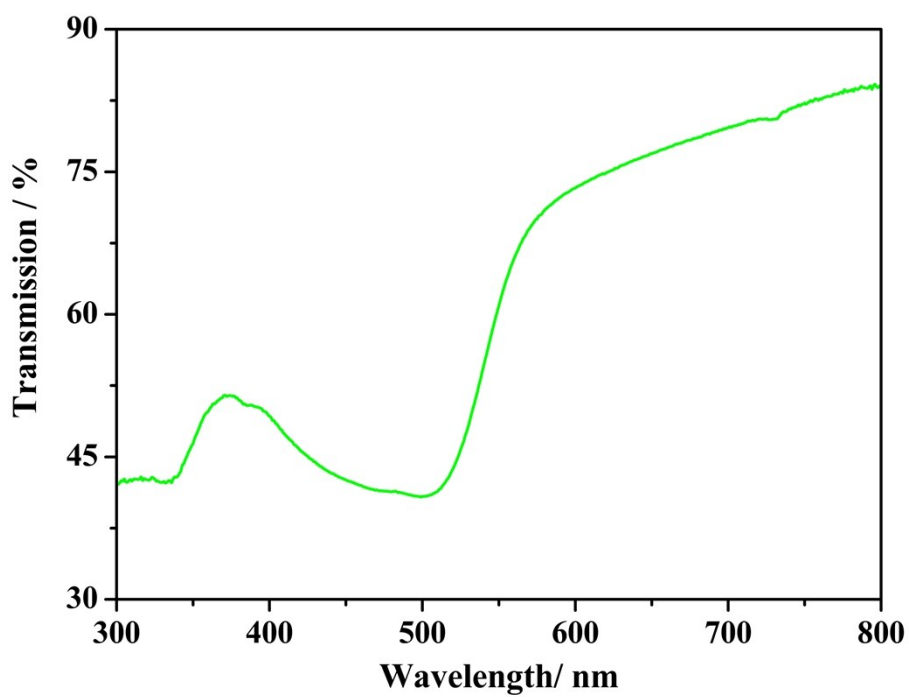

**Figure S3.** UV-Vis Transmission of **1**

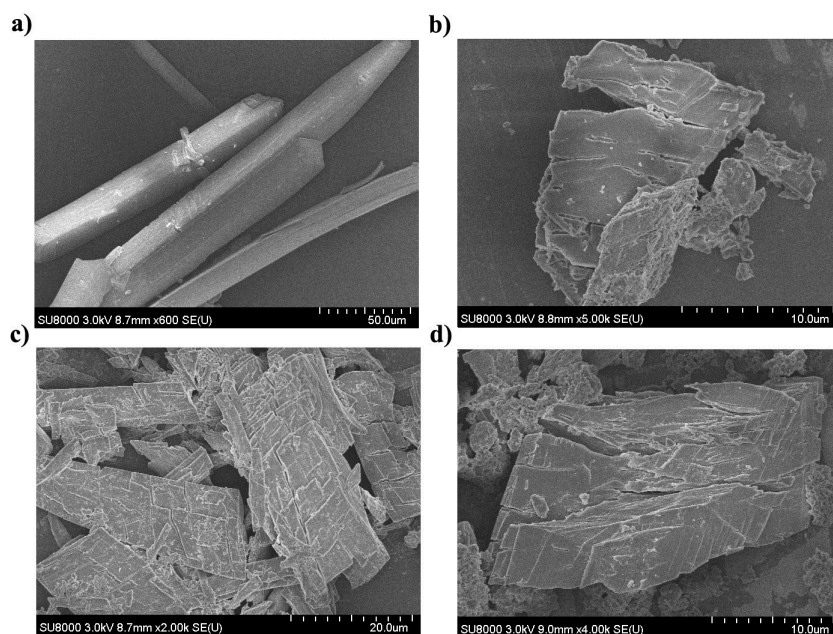

**Figure S4.** (a) Before reaction. (b) After benzylamine reaction. (c) After dibenzylamine reaction. (d) After nitrobenzene reaction.

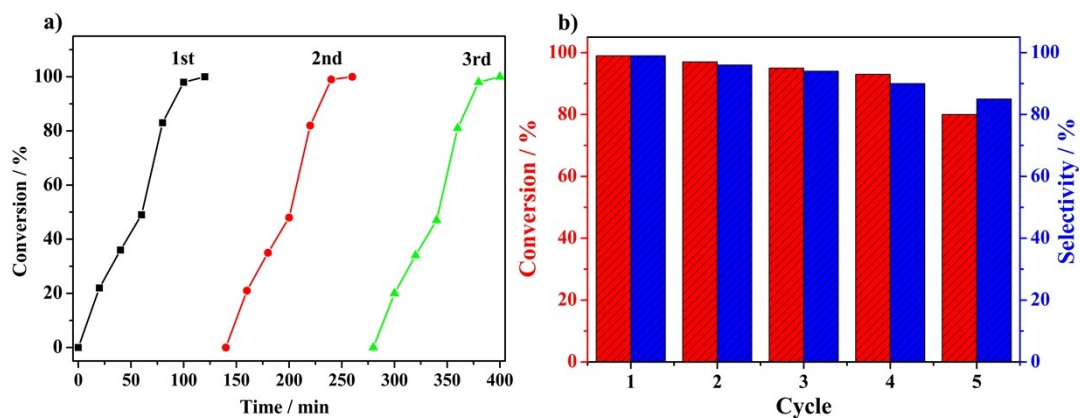

**Figure S5.** (a) Reaction trace for the dehydrogenation of secondary amines. (b) Conversion and selectivity in different runs.

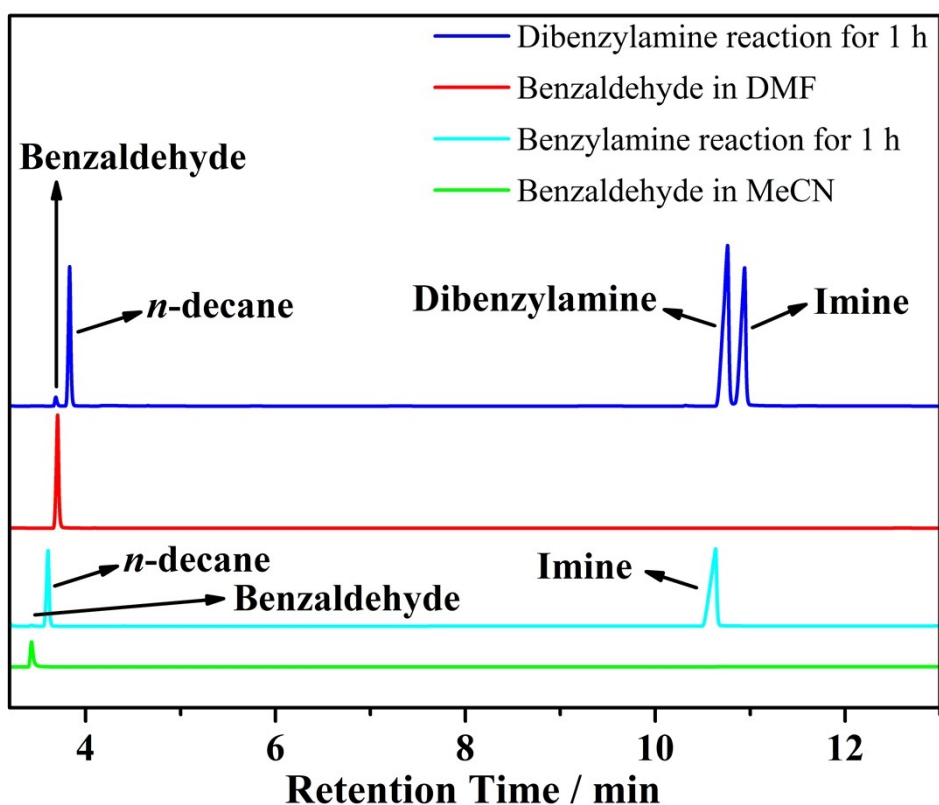

**Figure S6.** Formation of trace amount of benzaldehyde in the reaction of dibenzylamine and benzylamine at 1 h.

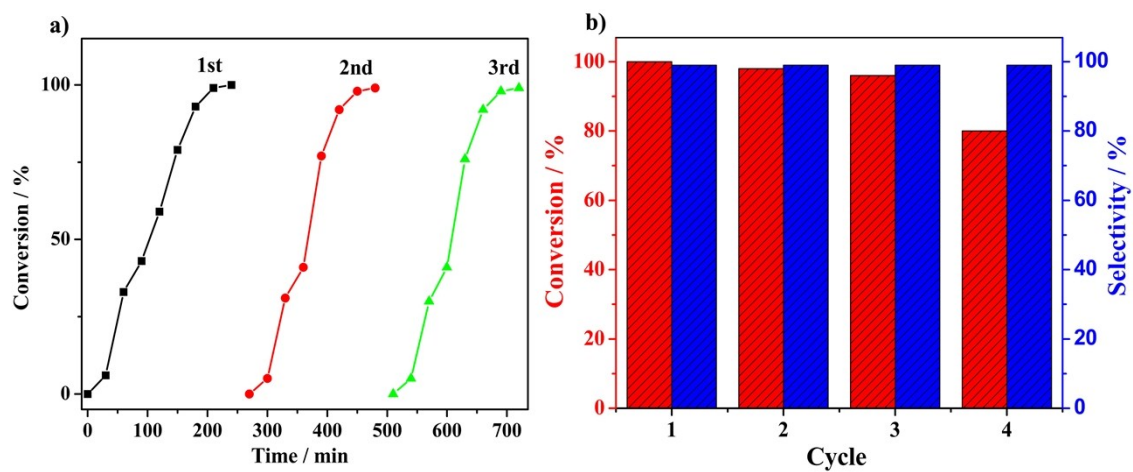

**Figure S7.** (a) Reaction trace for the photoreduction of nitrobenzene. (b) Conversion and selectivity in different runs.

**Table S1.** Crystal data and structural refinement of **1**.

| Compound                                            | <b>1</b>                                                        |
|-----------------------------------------------------|-----------------------------------------------------------------|
| empirical formula                                   | Zn <sub>3</sub> C <sub>64</sub> H <sub>32</sub> O <sub>10</sub> |
| formula weight                                      | 1157.07                                                         |
| crystal system                                      | Monoclinic                                                      |
| space group                                         | <i>C2/m</i>                                                     |
| <i>a</i> / Å                                        | 37.121(3)                                                       |
| <i>b</i> / Å                                        | 30.255(3)                                                       |
| <i>c</i> / Å                                        | 6.0011(5)                                                       |
| $\alpha$ / degree                                   | 90.0000                                                         |
| $\beta$ / degree                                    | 94.396(3)                                                       |
| $\gamma$ / degree                                   | 90.0000                                                         |
| <i>V</i> / Å <sup>3</sup>                           | 6720.0(10)                                                      |
| <i>Z</i>                                            | 2                                                               |
| <i>F</i> (000)                                      | 1172.0                                                          |
| $\theta$ range collected / degree                   | 2.54 to 20.66                                                   |
| limiting indices                                    | -36 ≤ <i>h</i> ≤ 36<br>-30 ≤ <i>k</i> ≤ 30<br>-5 ≤ <i>l</i> ≤ 5 |
| Reflections collected / unique                      | 7359/2359                                                       |
| data / restraints / parameters                      | 3551/95/200                                                     |
| <i>R</i> (int)                                      | 0.0796                                                          |
| goodness-of-fit on <i>F</i> <sup>2</sup>            | 1.041                                                           |
| Final <i>R</i> indices ( <i>I</i> > 2σ( <i>I</i> )) | <i>R</i> <sub>1</sub> = 0.0550 <i>wR</i> <sub>2</sub> = 0.1477  |
| <i>R</i> indices (all data)                         | <i>R</i> <sub>1</sub> = 0.0867 <i>wR</i> <sub>2</sub> = 0.1675  |

**Table S2.** Solvent influence on photocatalytic self-coupling of benzylamines over **1**.<sup>a</sup>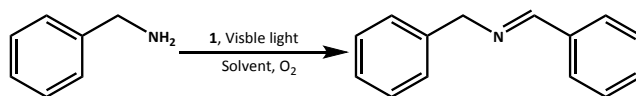

| Solvent           | Time [h] | Yield. [%] <sup>b</sup> |
|-------------------|----------|-------------------------|
| MeCN              | 1        | 99                      |
| DMF               | 2        | 99                      |
| AcOEt             | 2        | 99                      |
| DMSO              | 4        | 99                      |
| EtOH              | 5        | 99                      |
| MeOH              | 6        | 99                      |
| CHCl <sub>3</sub> | 6        | 99                      |

<sup>a</sup>Reaction conditions: 0.2 mmol benzylamines, 5 mg **1**, 1 mL solvent. <sup>b</sup>Determined by GC using *n*-decane as internal standard.

**Table S3.** Photocatalytic self-coupling of benzylamines under various conditions.<sup>a</sup>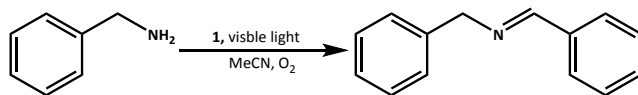

| Entry          | Photocatalyst | O <sub>2</sub> | Light | Conv. [%] <sup>b</sup> |
|----------------|---------------|----------------|-------|------------------------|
| 1              | +             | +              | +     | 99                     |
| 2 <sup>c</sup> | +             | +              | +     | 24                     |
| 3              | -             | +              | +     | -                      |
| 4              | +             | +              | -     | -                      |
| 5 <sup>d</sup> | +             | -              | +     | 25                     |
| 6 <sup>e</sup> | +             | -              | +     | 50                     |
| 7 <sup>f</sup> | +             | +              | +     | 21                     |
| 8 <sup>g</sup> | +             | +              | +     | 37                     |
| 9 <sup>h</sup> | +             | +              | +     | 12                     |

<sup>a</sup>Reaction conditions: 0.2 mmol amine, 5 mg **1**, 1 mL MeCN, 60 min under visible light. <sup>b</sup>Determined by GC using *n*-decane as the internal standard. <sup>c</sup>ADBEB. <sup>d</sup>N<sub>2</sub>. <sup>e</sup>Air. <sup>f</sup>TEOA was added as a hole scavenger. <sup>g</sup>10 μL TEMP was added as a singlet oxygen scavenger. <sup>h</sup>10 μL DMPO was added as a superoxide radical scavenger.

**Table S4.** Performances of visible-light-induced self-coupling of benzylamine using MOFs photocatalysts at room temperature.

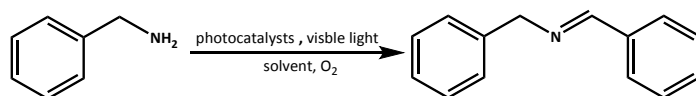

| catalyst                     | solvent            | T [h] | Yield. [%] | TOF [h <sup>-1</sup> ] | Refs      |
|------------------------------|--------------------|-------|------------|------------------------|-----------|
| ZJU-56-0.2                   | CH <sub>3</sub> CN | 24    | 62         | 2.6                    | 1         |
| ZJU-56-0.6                   | CH <sub>3</sub> CN | 24    | 84         | 3.5                    | 1         |
| NH <sub>2</sub> -MIL-125(Ti) | CH <sub>3</sub> CN | 12    | 73         | 5.3                    | 2         |
| In-MOF                       | DMSO               | 2.5   | 99         | 13.4                   | 3         |
| Zn-PDI                       | CH <sub>3</sub> CN | 4     | 74         | 18.5                   | 4         |
| PCN-222                      | CH <sub>3</sub> CN | 1     | 100        | 25.7                   | 5         |
| <b>1</b>                     | CH <sub>3</sub> CN | 1     | 99         | 45.8                   | This work |

**Table S5.** Solvent influence on photocatalytic dehydrogenation of dibenzylamine over **1**.<sup>a</sup>

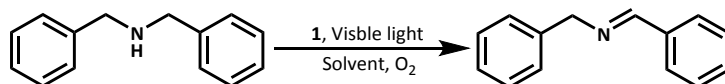

| Solvent           | Time [h] | Yield. [%] <sup>b</sup> |
|-------------------|----------|-------------------------|
| DMF               | 2        | 99                      |
| DMSO              | 3        | 99                      |
| EtOH              | 6        | 60                      |
| CHCl <sub>3</sub> | 6        | 72                      |
| MeOH              | 6        | 67                      |
| AcOEt             | 6        | 57                      |
| MeCN              | 8        | 99                      |

<sup>a</sup>Reaction conditions: 0.2 mmol secondary amines, 5 mg **1**, 1 mL solvent.

<sup>b</sup>Reactions were analysed by GC using *n*-decane as the internal standard.



**Table S6.** Photocatalytic dehydrogenation of dibenzylamine under various conditions.<sup>a</sup>

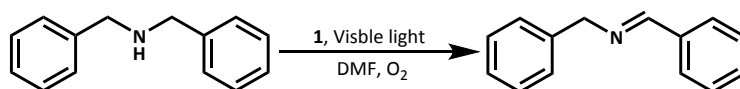

| Entry          | Photocatalyst | O <sub>2</sub> | Light | yield. [%] <sup>b</sup> |
|----------------|---------------|----------------|-------|-------------------------|
| 1              | +             | +              | +     | 99                      |
| 2              | -             | +              | +     | -                       |
| 3              | +             | +              | -     | -                       |
| 4 <sup>c</sup> | +             | -              | +     | -                       |
| 5 <sup>d</sup> | +             | -              | +     | 30                      |
| 6 <sup>e</sup> | +             | +              | +     | 28                      |
| 7 <sup>f</sup> | +             | +              | +     | 59                      |
| 8 <sup>g</sup> | +             | +              | +     | 48                      |

<sup>a</sup>Reaction conditions: 0.2 mmol amine, 5 mg **1**, 1 mL DMF, 2 hours under visible light. <sup>b</sup>Determined by GC using *n*-decane as the internal standard. <sup>c</sup>N<sub>2</sub>. <sup>d</sup>Air. <sup>e</sup>TEOA was added a hole scavenger. <sup>f</sup>10 μL TEMP was added as a singlet oxygen scavenger. <sup>g</sup>10 μL DMPO was added as a superoxide radical scavenger.

**Table S7.** Performances of visible-light-induced dehydrogenation of dibenzylamine using various photocatalysts at room temperature.

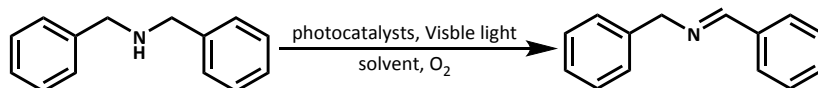

| Catalyst                            | Solvent                             | T [h] | Yield. [%] | TOF [h <sup>-1</sup> ] | Refs      |
|-------------------------------------|-------------------------------------|-------|------------|------------------------|-----------|
| BiVO <sub>4</sub>                   | CH <sub>3</sub> CN                  | 6     | 99.0       | 0.05                   | 6         |
| BiOCl                               | CH <sub>3</sub> CN                  | 10    | 99.0       | 0.1                    | 7         |
| Porous organic polymer (POP) CF-HCP | CH <sub>3</sub> CN                  | 6     | 80.6       | 6.0                    | 8         |
| Rh/carbon nanotube                  | CHCl <sub>3</sub> /H <sub>2</sub> O | 13    | 95         | 7.3                    | 9         |
| Cu-based polyoxometalate            | CH <sub>3</sub> CN                  | 16    | 95         | 12.5                   | 10        |
| PCN-222                             | CH <sub>3</sub> CN                  | 1     | 100        | 25.7                   | 5         |
| <b>1</b>                            | DMF                                 | 2     | 99         | 22.9                   | This work |

**Table S8.** Photoreduction of nitrobenzene under various conditions.<sup>a</sup>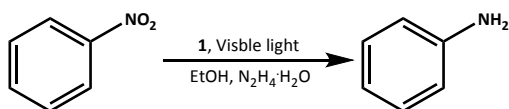

| Entry          | Photocatalyst | N <sub>2</sub> H <sub>4</sub> ·H <sub>2</sub> O | Light | Conv. [%] <sup>b</sup> |
|----------------|---------------|-------------------------------------------------|-------|------------------------|
| 1              | -             | +                                               | +     | -                      |
| 2              | +             | +                                               | -     | -                      |
| 3              | +             | -                                               | +     | -                      |
| 4              | +             | +                                               | +     | 99                     |
| 5 <sup>c</sup> | +             | +                                               | +     | 74                     |
| 6 <sup>d</sup> | +             | +                                               | +     | 44                     |

<sup>a</sup>Reaction conditions: 0.1 mmol nitrobenzene, 5 mg **1**, 4mmol N<sub>2</sub>H<sub>4</sub>·H<sub>2</sub>O, 1 mL EtOH, 4 hour under visible light. <sup>b</sup>Determined by GC using *n*-decane as the internal standard. <sup>c</sup>3mmol N<sub>2</sub>H<sub>4</sub>·H<sub>2</sub>O. <sup>d</sup>5 mmol N<sub>2</sub>H<sub>4</sub>·H<sub>2</sub>O.

**Table S9.** Solvent influence on photoreduction of nitrobenzene over **1**.<sup>a</sup>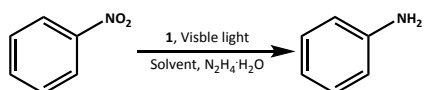

| Solvent           | T [h] | Yield. [%] <sup>b</sup> |
|-------------------|-------|-------------------------|
| EtOH              | 4     | 99                      |
| MeCN              | 6     | 99                      |
| AcOEt             | 6     | 70                      |
| DMSO              | 8     | 99                      |
| DMF               | 8     | 99                      |
| CHCl <sub>2</sub> | 12    | 99                      |
| CHCl <sub>3</sub> | 12    | 53                      |

<sup>a</sup>Reaction conditions: 0.1 mmol nitrobenzene, 5 mg **1**, 1 mL solvent, 4 mmol hydrazine. <sup>b</sup>Reactions were analysed by GC using *n*-decane as the internal standard.

**Table S10.** Performances of visible-light-induced photoreduction of nitrobenzene using various photocatalysts at room temperature.

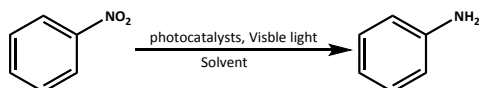

| Catalyst    | Solvent               | T [h] | Yield. [%] | TOF [h <sup>-1</sup> ] | Refs      |
|-------------|-----------------------|-------|------------|------------------------|-----------|
| CdS         | water                 | 4     | 99         | 1.4                    | 11        |
| Eosin Y     | EtOH/H <sub>2</sub> O | 24    | 99         | 4.2                    | 12        |
| Ag/GO/LDH   | Benzyl alcohol        | 4     | 47         | 7.0                    | 13        |
| Au/GO/LDH   | Benzyl alcohol        | 4     | 68         | 4.4                    | 13        |
| AuAg/GO/LDH | Benzyl alcohol        | 3     | 91.6       | 10.9                   | 13        |
| <b>1</b>    | EtOH                  | 4     | 99         | 5.8                    | This work |

## References

- H. Li, Y. Yang, C. He, L. Zeng and C. Duan, *ACS Catal.*, 2019, **9**, 422–430.
- D. Sun, L. Ye and Z. Li, *Applied Catalysis B: Environmental*, 2015, **164**, 428–432.
- H. Wei, Z. Guo, X. Liang, P. Chen, H. Liu and H. Xing, *ACS Appl Mater Interfaces*, 2019, **11**, 3016–3023.
- L. Zeng, T. Liu, C. He, D. Shi, F. Zhang and C. Duan, *J. Am. Chem. Soc.*, 2016, **138**, 3958–3961.
- C. Xu, H. Liu, D. Li, J. H. Su and H. L. Jiang, *Chem. Sci.*, 2018, **9**, 3152–3158.
- B. Yuan, R. Chong, B. Zhang, J. Li, Y. Liu and C. Li, *Chem Commun.*, 2014, **50**, 15593–15596.
- Y. Wu, B. Yuan, M. Li, W. H. Zhang, Y. Liu and C. Li, *Chem. Sci.*, 2015, **6**, 1873–1878.
- Y. Zhi, K. Li, H. Xia, M. Xue, Y. Mu and X. Liu, *J. Mater. Chem. A*, 2017, **5**, 8697–8704.
- D. V. Jawale, E. Gravel, N. Shah, V. Dauvois, H. Li, I. N. Namboothiri and E. Doris, *Chem. Eur. J.*, 2015, **21**, 7039–7042.
- H. Yu, Y. Zhai, G. Dai, S. Ru, S. Han and Y. Wei, *Chem. Eur. J.*, 2017, **23**, 13883–13887.
- M. Kaur and C. M. Nagaraja, *ACS Sustainable Chem. Eng.*, 2017, **5**, 4293–4303.
- X. J. Yang, B. Chen, L. Q. Zheng, L. Z. Wu and C. H. Tung, *Green Chem.*, 2014, **16**, 1082–1086.
- M. Sahoo, S. Mansingh and K. M. Parida, *J. Mater. Chem. A*, 2019, **7**, 7614–7627.
